# Supplementary material
Source: publisher figshare collection journal article supplement (https://acs.figshare.com/ndownloader/files/10598377)
Supplement: Supplementary file 1 [file 10598377]

## **Supporting Information**

### **Materials and Energy Recovery from E-Waste Plastics**

*Sriraam R Chandrasekaran<sup>1,\*</sup>, Sumant Avasarala<sup>2</sup>, Dheeptha Murali<sup>1</sup>, Nandakishore  
Rajagopalan<sup>1</sup>, Brajendra K. Sharma<sup>1,\*</sup>*

<sup>1</sup> *Prairie Research Institute-Illinois Sustainable Technology Center, University of Illinois  
Urbana Champaign, 1 East Hazelwood Drive, Champaign, IL 61820-7465*

<sup>2</sup> *Department of Civil and Environmental Engineering, 1 University of New Mexico,  
Albuquerque, NM 87131*

\* Corresponding email address: [schandr@illinois.edu](mailto:schandr@illinois.edu), [bksharma@illinois.edu](mailto:bksharma@illinois.edu)

Telephone: (001) (217) 300-1477, (001) (217) 265-6810

Fax: (001) (217) 333-8944

# Table of Contents

|                         |           |
|-------------------------|-----------|
| <b>I. Tables.....</b>   | <b>S3</b> |
| Table S1.....           | S3        |
| Table S2.....           | S4        |
| Table S3.....           | S4        |
| Table S4.....           | S5        |
| Table S5.....           | S6        |
| <b>II. Figures.....</b> | <b>S8</b> |
| Figure S1.....          | S8        |
| Figure S2.....          | S9        |
| Figure S3.....          | S10       |
| Figure S4.....          | S11       |
| Figure S5.....          | S12       |
| Figure S6.....          | S13       |
| Figure S6.....          | S14       |

**Table S1.** Impurities found in NMP solvent

| <b><u>Retention Time, min</u></b> | <b><u>Best NIST Library Match</u></b>                               | <b><u>CAS#</u></b> | <b><u>Formula</u></b>                                          | <b><u>Molecular Mass</u></b> | <b><u>CI M+1 Ion?</u></b> |
|-----------------------------------|---------------------------------------------------------------------|--------------------|----------------------------------------------------------------|------------------------------|---------------------------|
| 10.21                             | Phenol, 4-(1-methyl-1-phenylethyl)-                                 | 599-64-4           | C <sub>15</sub> H <sub>16</sub> O                              | 212                          | Yes                       |
| 11.17                             | Styrene, 2-nitro-3'-[4-methylphenoxy]-                              | None               | C <sub>15</sub> H <sub>13</sub> NO <sub>3</sub>                | 255                          | No                        |
| 11.51                             | 2-(4'-Hydroxyphenyl)-2-(4'-methoxyphenyl)propane                    | 16530-58-8         | C <sub>16</sub> H <sub>18</sub> O <sub>2</sub>                 | 242                          | Yes                       |
| 11.84                             | Phenol, 4,4'-(1-methylethylidene)bis-                               | 80-05-7            | C <sub>15</sub> H <sub>16</sub> O <sub>2</sub>                 | 228                          | Yes                       |
| 12.36                             | 2,2,6,6-Tetramethyl-1,5-dioxo-2,6-disila-3,4:7,8-dibenzocyclooctane | 39533-13-6         | C <sub>16</sub> H <sub>20</sub> O <sub>2</sub> Si <sub>2</sub> | 300                          | No                        |
| 12.68                             | Ether, $\alpha,\alpha$ -dimethylbenzyl bis(trifluoromethyl)methyl   | None               | C <sub>12</sub> H <sub>12</sub> F <sub>6</sub> O               | 286                          | No                        |
| 13.50                             | 15-Hydroxy-7-oxodehydroabietic acid, methyl ester                   | 60188-95-6         | C <sub>21</sub> H <sub>28</sub> O <sub>4</sub>                 | 344                          | No                        |

### ***Estimation of Energy based on Heat of Combustion***

Heat of combustion method is a quick method to estimate the net energy required for pyrolysis process. The difference between the heat of combustion of the plastic and the heat of combustion of products formed from the plastic pyrolysis represents the net energy required for pyrolysis. The **heat of combustion** ( $\Delta H_c$ ) is the energy released as heat when a substance undergoes complete combustion in presence of oxygen.

**Table S2.** Heat of combustion of common polymers

| S. No | Polymer Material                              | Gross Heat of Combustion<br>MJ/Kg | Net Heat of Combustion<br>MJ/Kg |
|-------|-----------------------------------------------|-----------------------------------|---------------------------------|
| 1     | Polyethylene (PE)                             | 47.74                             | 44.6                            |
| 2     | Polypropylene (PP)                            | 45.8                              | 42.66                           |
| 3     | Polystyrene (PS)                              | 43.65                             | 41.96                           |
| 4     | Polyacrylonitrilebutadiene-styrene (Poly-ABS) | 29.38                             | 28.38                           |
| 5     | Polycarbonate (PC)                            | 31.53                             | 30.32                           |
| 6     | Polyethylene Terephthalate (PET)              | 24.13                             | 23.22                           |
| 7     | Polymethyl Methacrylate (PMMA)                | 27.75                             | 24.99                           |
| 8     | Polytetrafluoroethylene (PTFE)                | 6.68                              | 6.68                            |
| 9     | Polyamideimide (PAI)                          | 24.97                             | 24.31                           |
| 10    | Polyetheretherketone (PEEK)                   | 31.5                              | 30.57                           |

Net heat of combustion is gross heat of combustion minus the latent heat of vaporization of the water produced during the reaction. The gross heat of combustion measured is corrected for the heat of vaporization of the water formed during the combustion to give the net heat of combustion.

**Table S3.** Heat of combustion of common fuels

| S. No | Fuels    | Gross Heat of Combustion<br>MJ/Kg | Net Heat of Combustion<br>MJ/Kg |
|-------|----------|-----------------------------------|---------------------------------|
| 1     | Hydrogen | 141.8                             | 121                             |
| 2     | Methane  | 55.5                              | 50                              |
| 3     | Ethane   | 51.9                              | 47.8                            |
| 4     | Propane  | 50.35                             | 46.35                           |
| 5     | Butane   | 49.5                              | 45.75                           |
| 6     | Pentane  |                                   | 45.35                           |
| 7     | Gasoline | 47.3                              | 44.4                            |
| 8     | Paraffin | 46                                | 41.5                            |
| 9     | Kerosene | 46.2                              | 43                              |
| 10    | Diesel   | 44.8                              | 43                              |

For the product distribution summarized in Table 5 in the manuscript, the net heat of combustion is approximately equal to 30.646 and 29.22 MJ/Kg PC and PC mixtures, respectively, calculated using the equation:

$$Q_p = \sum w_i Q_i$$

where  $Q_p$  is the net heat of combustion from the products,  $w_i$  is the percentage of product  $i$ , which can be propane, gasoline, diesel or wax and  $Q_i$  is the heat of combustion of product  $i$ . In the current study, gaseous fraction was not collected and analyzed and the heat value was not included. Thus the net energy gain could be much higher. The difference in the energy is then 390 KJ/kg and 1950 KJ/Kg for PP and PE respectively (Table 4) calculated using the formula:

$$Q_{net} = Q_p - Q_r$$

Where  $Q_{net}$  is the net energy required for pyrolysis,  $Q_r$  is the heat of combustion of reactants

Table S4. Calculations of net energy for heat of combustion

| Fractions                | PC     | PC mixture |
|--------------------------|--------|------------|
|                          | MJ/kg  |            |
| <35C- Light hydrocarbons | 0      | 1.39       |
| 35-185-Motor Gasoline    | 17.316 | 10.2       |
| 185-350 Diesel           | 9.89   | 12.04      |
| >350C- Vacuum Gas Oil    | 3.44   | 5.59       |
| Sum (Qnet)               | 30.646 | 29.22      |
| Qp-Qnet                  | 0.884  | 2.31       |

Table S5. TGA results on various plastic samples present in cellphone plastic waste

| Sample                          | Temp<br>1%<br>mass<br>loss<br>(°C) | Temp<br>50%<br>mass<br>loss<br>(°C) | Peak<br>Temp<br>dTGA<br>(°C) | Char<br>weight%<br>600°C |
|---------------------------------|------------------------------------|-------------------------------------|------------------------------|--------------------------|
| Cell Phone Plastic #1 (Run 1)   | 155                                | N/A                                 | 390                          | 55.80%                   |
| Cell Phone Plastic #1 (Run 2)   | 244                                | N/A                                 | 390                          | 56.70%                   |
| Cell Phone Plastic #2 (Run 1)   | 406                                | 507                                 | 506                          | 25.60%                   |
| Cell Phone Plastic #2 (Run 2)   | 370                                | 509                                 | 507                          | 25.60%                   |
| Cell Phone Plastic #4 (Run 1)   | 316                                | 502                                 | 502                          | 24.20%                   |
| Cell Phone Plastic #4 (Run 2)   | 317                                | 505                                 | 505                          | 24.00%                   |
| Cell Phone Plastic #5 (Run 1)   | 301                                | 481                                 | 473                          | 34.40%                   |
| Cell Phone Plastic #5 (Run 2)   | 341                                | 486                                 | 477                          | 35.80%                   |
| Cell Phone Plastic #6 (Run 1)   | 340                                | 499                                 | 499                          | 23.30%                   |
| Cell Phone Plastic #6 (Run 2)   | 368                                | 500                                 | 499                          | 23.70%                   |
| Cell Phone Plastic #7 (Run 1)   | 283                                | 487                                 | 490                          | 20.20%                   |
| Cell Phone Plastic #7 (Run 2)   | 299                                | 491                                 | 493                          | 20.90%                   |
| Cell Phone Plastic #8 (Run 1)   | 289                                | 487                                 | 490                          | 20.40%                   |
| Cell Phone Plastic #8(Run 2)    | 353                                | 492                                 | 496                          | 21.60%                   |
| Cell Phone Plastic #9 (Run 1)   | 308                                | 507                                 | 505                          | 23.60%                   |
| Cell Phone Plastic #11 (Run 1)  | 399                                | 487                                 | 479                          | 36.90%                   |
| Cell Phone Plastic #11 (Run 2)  | 393                                | 488                                 | 480                          | 36.70%                   |
| Cell Phone Plastic #12 (Run 1)  | 333                                | 482                                 | 472                          | 36.20%                   |
| Cell Phone Plastic #12 (Run 2)  | 324                                | 480                                 | 471                          | 34.90%                   |
| Cell Phone Plastic #13 (Run 1)  | 307                                | 500                                 | 499                          | 23.20%                   |
| Cell Phone Plastic #13 (Run 2)  | 357                                | 502                                 | 502                          | 24.30%                   |
| Cell Phone Plastic #14 (Run 1)  | 319                                | 475                                 | 446                          | 42.80%                   |
| Cell Phone Plastic #14 (Run 2)  | 348                                | 472                                 | 442                          | 41.80%                   |
| Cell Phone Plastic #15 (Run 1)  | 328                                | 497                                 | 494                          | 28.60%                   |
| Cell Phone Plastic #15 (Run 2)  | 399                                | 495                                 | 492                          | 29.00%                   |
| Cell Phone Plastic #16 (Run 1)  | 276                                | 459                                 | 457                          | 18.10%                   |
| Cell Phone Plastic #16 (Run 2)  | 264                                | 470                                 | 478                          | 18.90%                   |
| Cell Phone Plastic #17 (Run 1)  | 351                                | 489                                 | 490                          | 21.30%                   |
| Cell Phone Plastic #17 (Run 2)  | 320                                | 497                                 | 498                          | 22.00%                   |
| Cell Phone Plastic #18 (Run 1)  | 288                                | 488                                 | 489                          | 21.30%                   |
| Cell Phone Plastic #18 (Run 2)  | 232                                | 475                                 | 481                          | 19.40%                   |
| Cell Phone Plastic # 19 (Run 1) | 228                                | 360                                 | 362                          | 0.40%                    |
| Cell Phone Plastic #19 (Run 2)  | 275                                | 361                                 | 362                          | 0.70%                    |
| Cell Phone Plastic #20 (Run 1)  | 350                                | 477                                 | 476                          | 20.20%                   |
| Cell Phone Plastic #20 (Run 2)  | 318                                | 483                                 | 487                          | 20.80%                   |

|                                       |     |     |     |        |
|---------------------------------------|-----|-----|-----|--------|
| <b>Cell Phone Plastic #21 (Run 1)</b> | 332 | 494 | 490 | 29.50% |
| <b>Cell Phone Plastic #21 (Run 2)</b> | 303 | 495 | 494 | 29.50% |
| <b>Cell Phone Plastic #22 (Run 1)</b> | 324 | 495 | 495 | 24.70% |
| <b>Cell Phone Plastic #22 (Run 2)</b> | 281 | 501 | 500 | 25.40% |
| <b>Cell Phone Plastic #23 (Run 1)</b> | 343 | 498 | 499 | 23.70% |
| <b>Cell Phone Plastic #23 (Run 2)</b> | 411 | 502 | 502 | 24.10% |
| <b>Cell Phone Plastic #24 (Run 1)</b> | 343 | 486 | 488 | 21.40% |
| <b>Cell Phone Plastic #24 (Run 2)</b> | 292 | 499 | 499 | 22.10% |
| <b>Cell Phone Plastic #24 (Run 1)</b> | 315 | 488 | 490 | 21.10% |
| <b>Cell Phone Plastic #24 (Run 2)</b> | 340 | 490 | 492 | 21.60% |

---

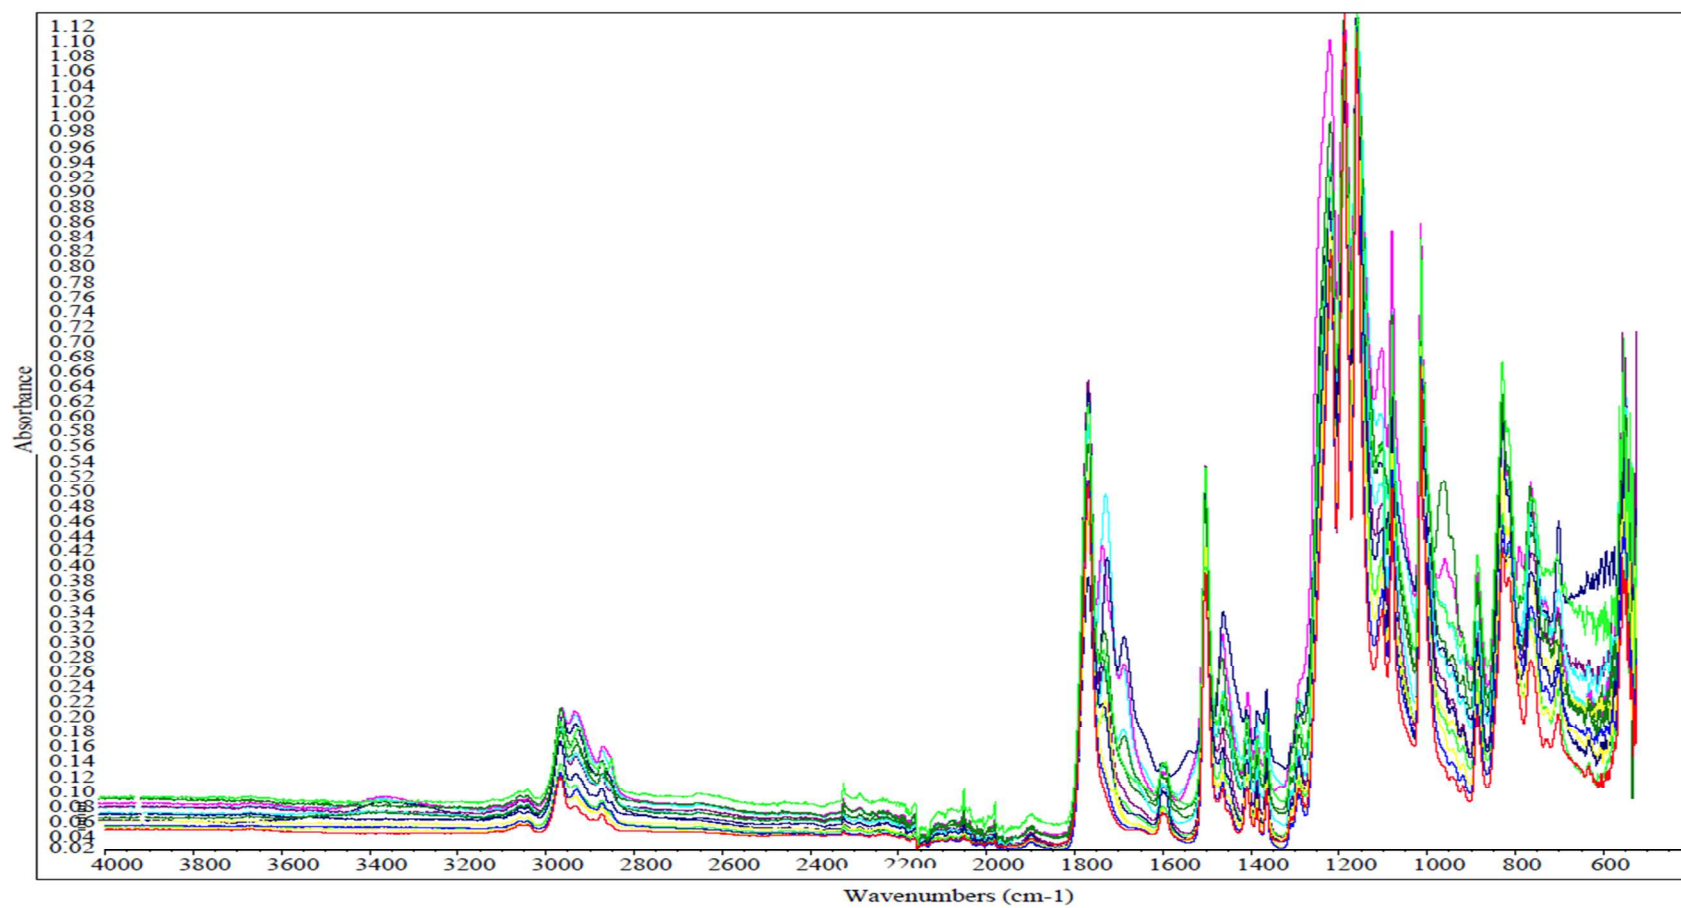

**Figure S1.** FTIR Spectra of 23 cellphone plastic materials received from HOBI



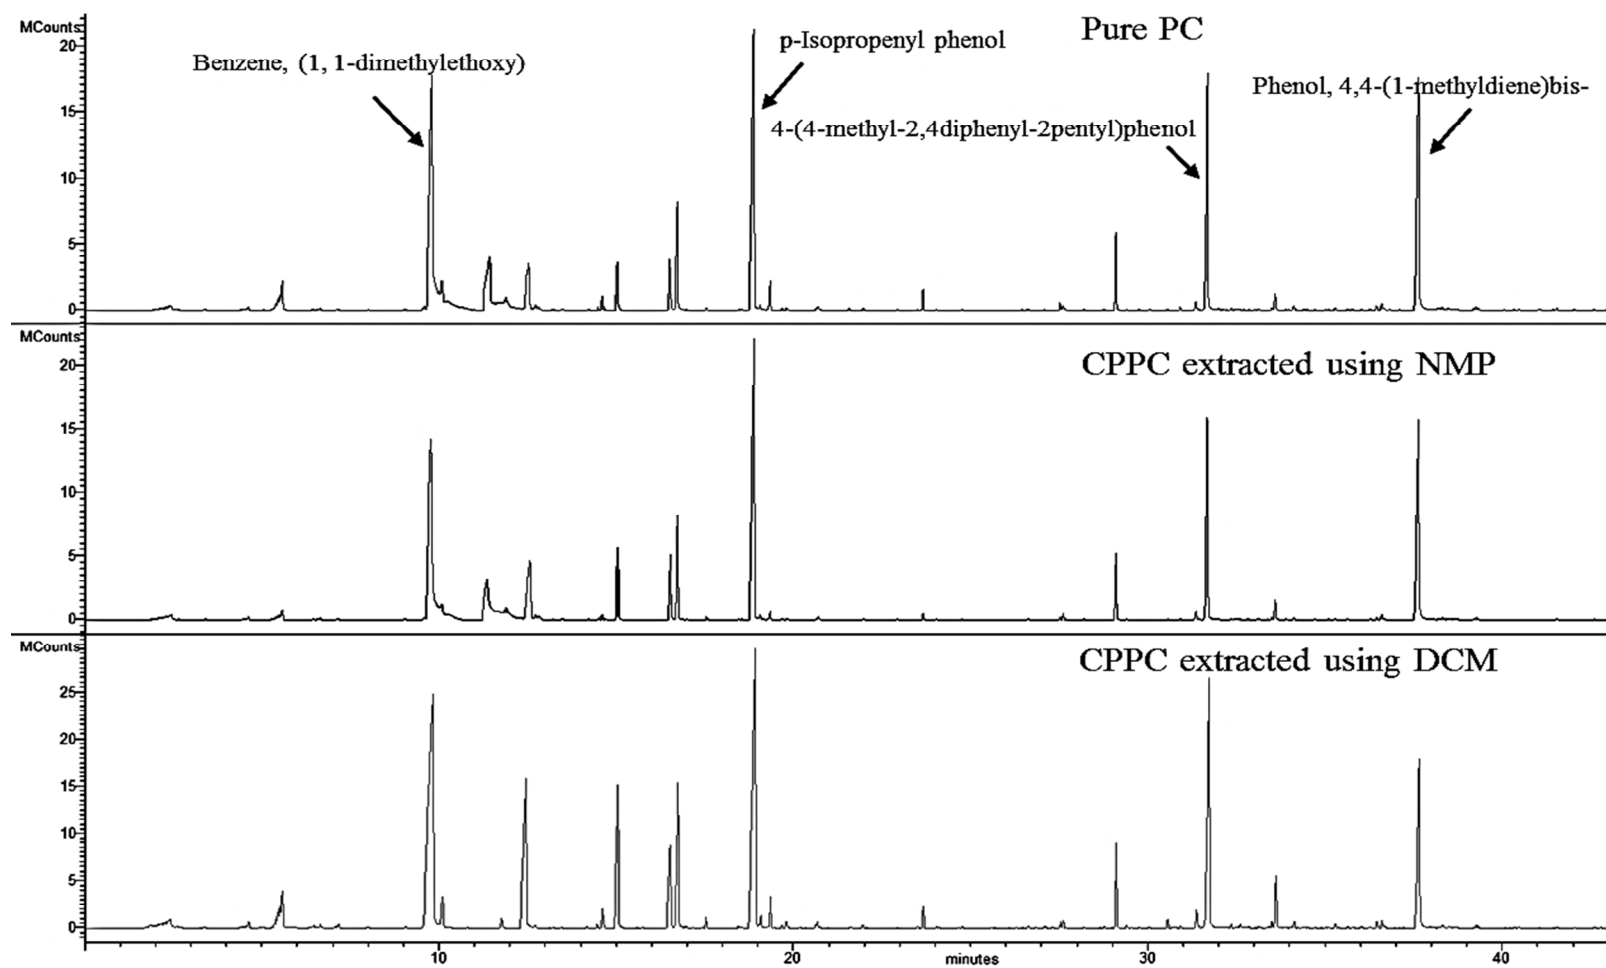

**Figure S2.** Comparison of pyrograms obtained from pygc-ms of PPC, CPPC recovered with NMP, and CPPC recovered with DCM

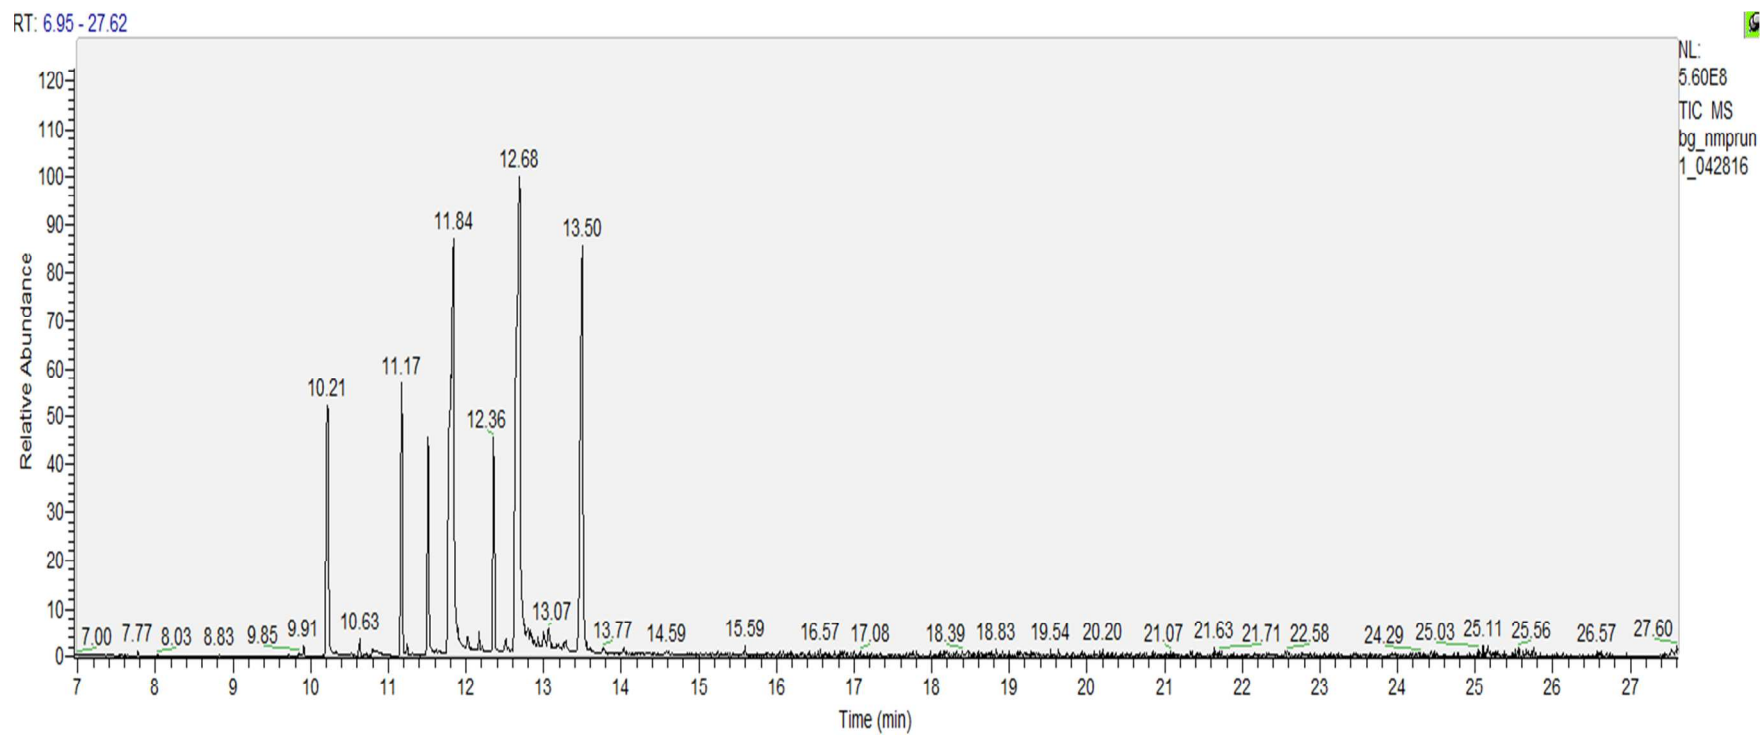

**Figure S3.** Chromatograms of the impurities

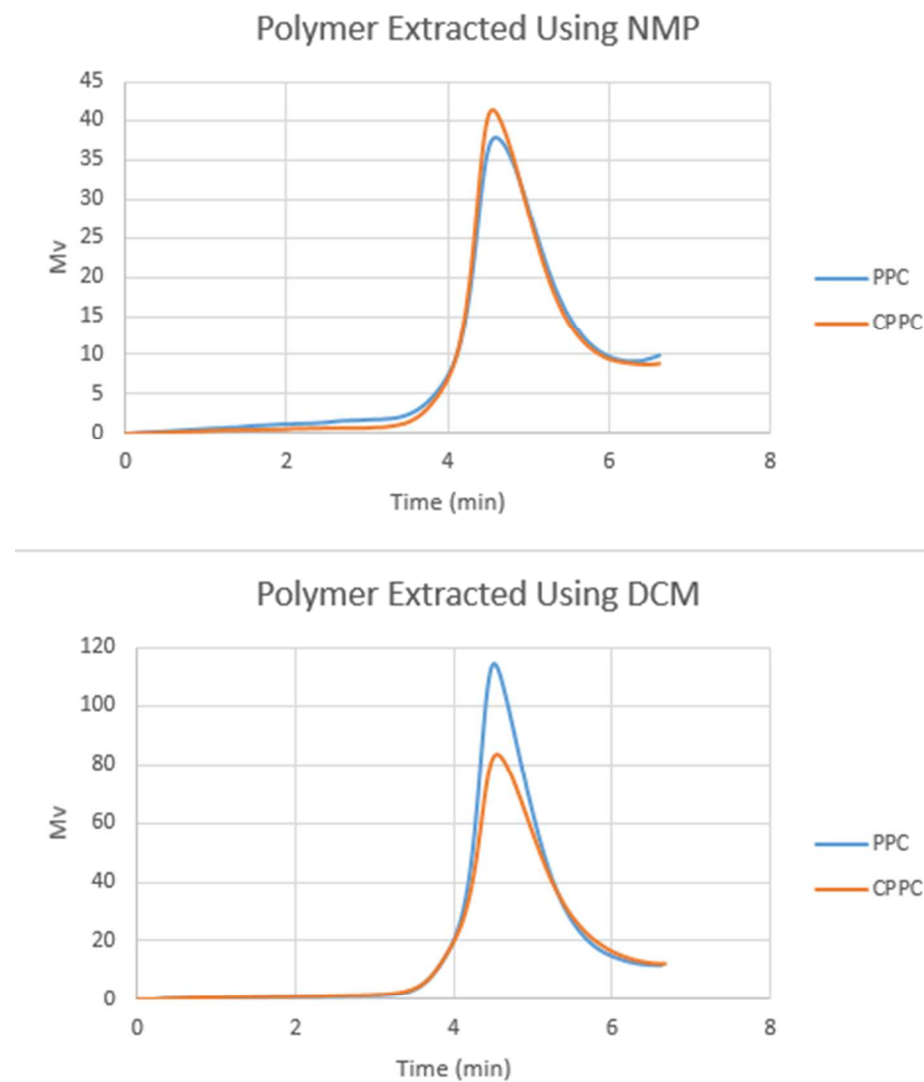

**Figure S4.** GPC Chromatograms of Polycarbonates extracted from NMP and DCM

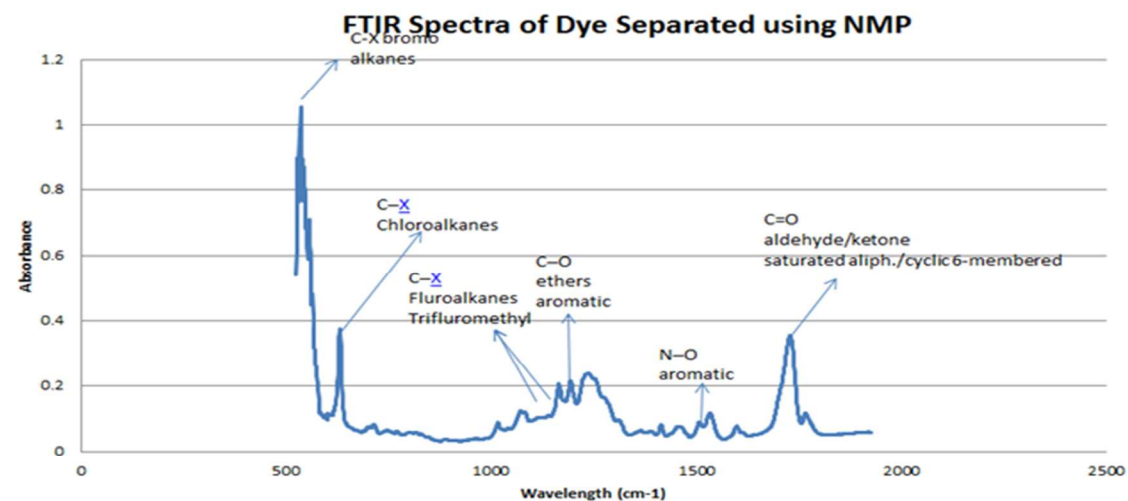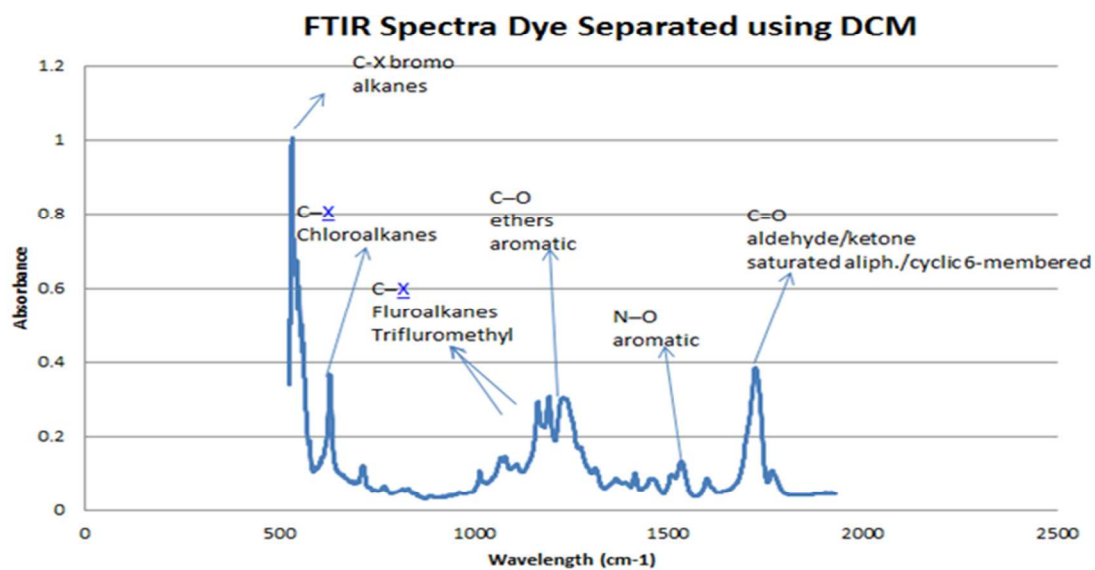

**Figure S5.** FTIR spectra of the dye

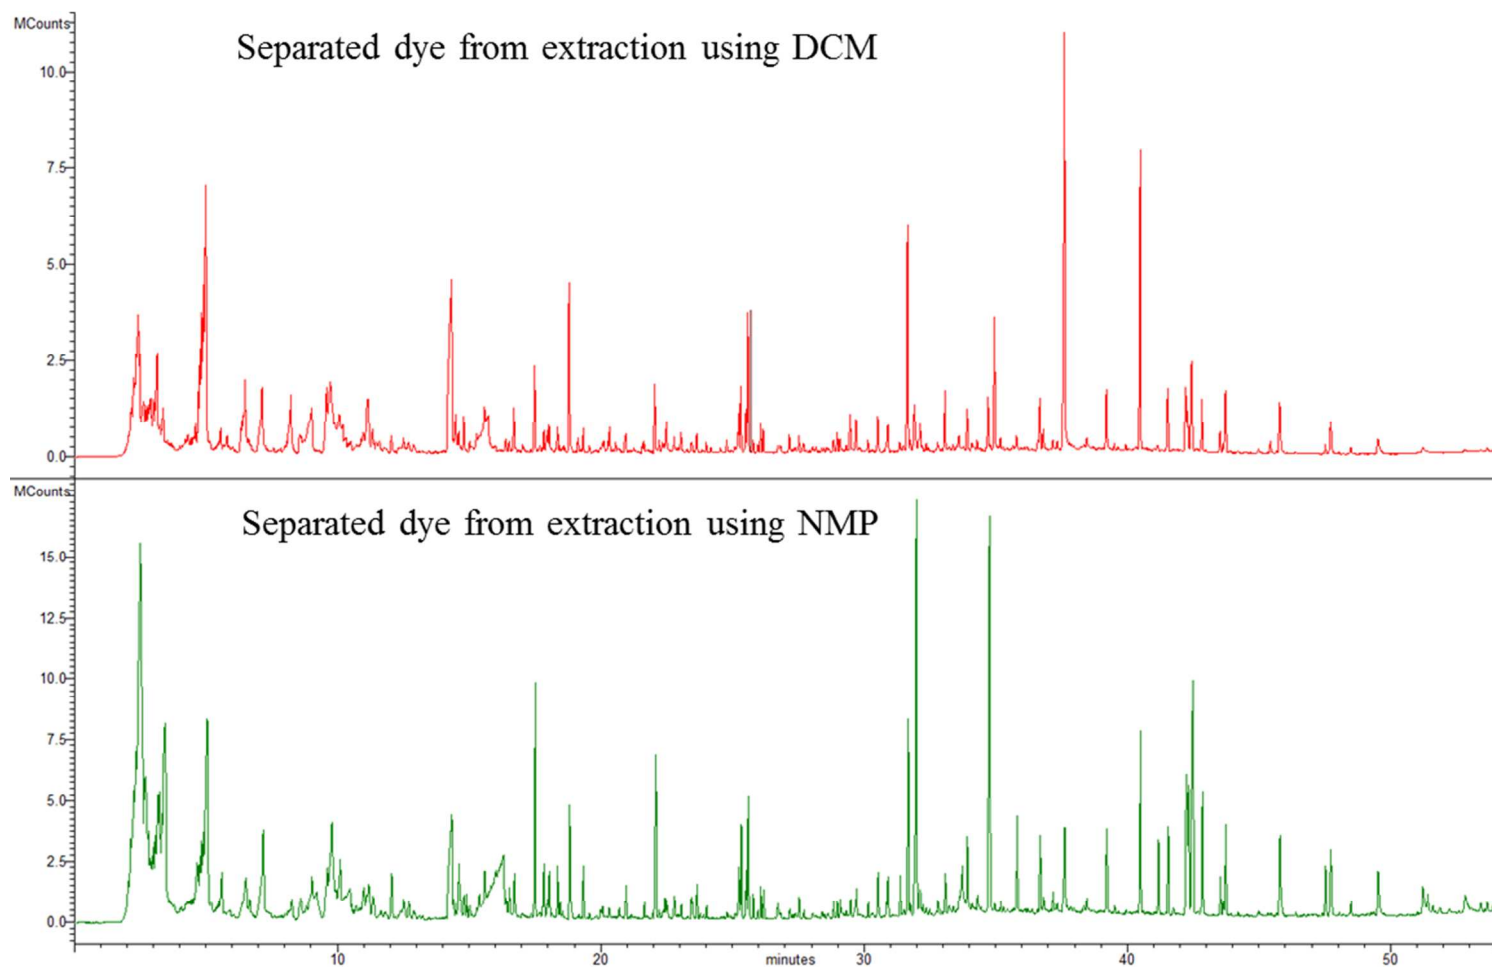

**Figure S6.** Pygcms spectra of the dye

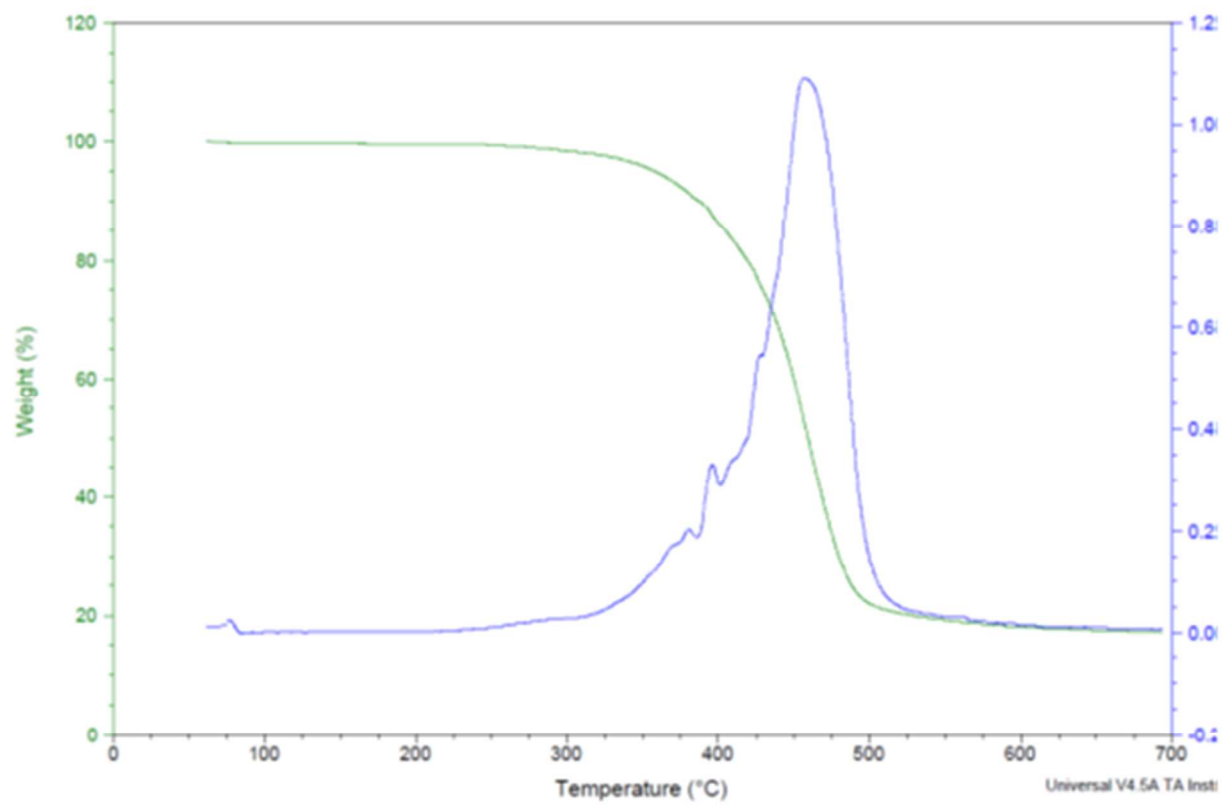

**Figure S7.** Typical thermogram of cellphone plastic (model for sample # 19)
